# Supplementary material for: Multimodal Structural Neuroimaging Markers of Brain Development and ADHD Symptoms
Source: Atypon-hosted journal article supplement (doi:10.1176/appi.ajp.2018.18010034), 2018-09-17
Supplement: appi.ajp.2018.18010034.ds001.pdf [file appi.ajp.2018.18010034.ds001.pdf]

 


Psychiatry Online
